# Supplementary material
Source: PubMed Central journal article supplement (PMC5808582)

# Supplementary figure 3

A

Human PRKAA1 Coverage: 74.78%

```
1  MRRLLSSWRKMTAEKQKHDGRVKGIGHYILGDTLGVGTFGKVKVKGHELTGHKVAVKILNR
61  QKIRSLDVVGKIRREIQNLKLFRRHPHIKLYQVISTPDSIFVMMEYVSGGELFDYICKNG
121  RLDEKESRRLRFQOILSGVDYCHRHMVVHRDLKPENVLDDAHMNAKIADFGLSNMMSDGEF
181  LRTSCGSPNYAAPEVISGRLYAGPEVDIWSGGVILYALLCGTLPFDDDHVPTLFKIKICDG
241  IFYTPQYLNPSVISLLKHMQLQVDPMKRATIKDIREHEWFKQDLPKYLPEDPSSYSTMID
301  DEALKEVCEKFCFECSEEEVLSCLYNRNHQDPLAVAYHLIIDNRRIMNEAKDFYLATSPDSD
361  FLDDHHLTRPHERVPFLVAETPRARHTLDELNPQKSKHQGVKAKWHLGRSQRPNDI
421  MAEVCRAIKQLDYEWKVVNPPYLLVRRKNPVTSTYSKMSLQLYQVDSRTYLLDFRSIDDE
481  ITEAKSGTATPQRSGSVSNYRSCQRSDSDAEAQGKSSEVSLTSSVTSLDSSPVDLTPRPG
541  SHTIEFFEMCANLIKILAQ
```

B

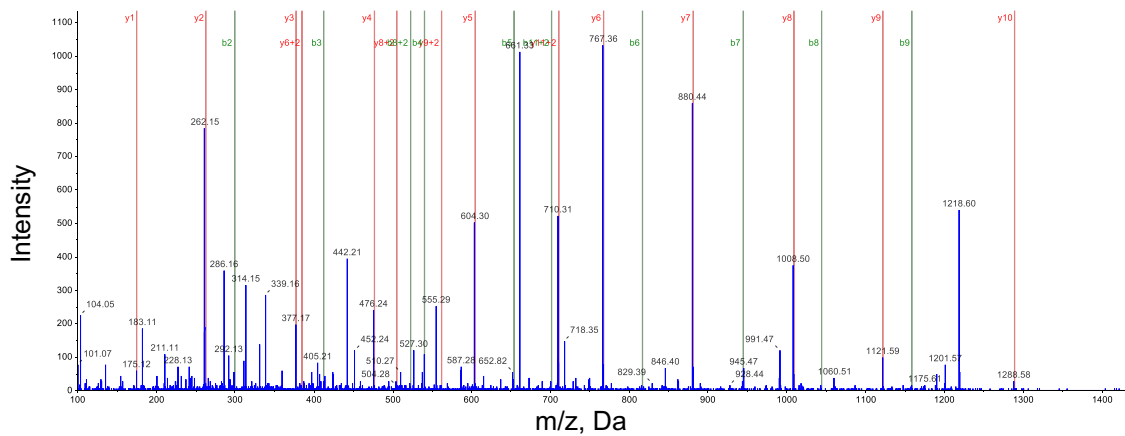

C

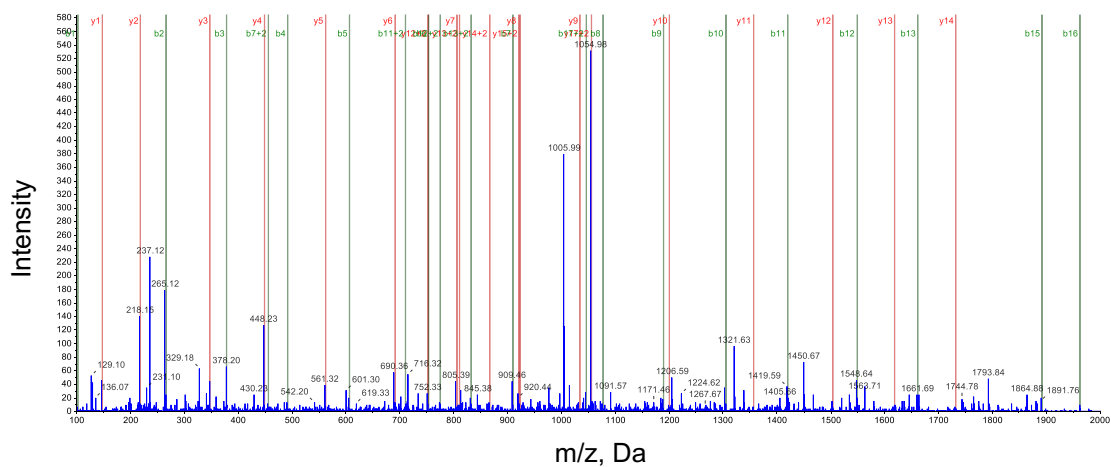

Supplement: NIHMS933063-supplement-3.pdf [file NIHMS933063-supplement-3.pdf]
