# Supplementary material
Source: PubMed Central journal article supplement (PMC5808582)

# Supplementary figure 4

**A**

|                     |   |   |   |   |   |   |
|---------------------|---|---|---|---|---|---|
| Empty vector        | - | - | - | + | + | + |
| HA-AMPK $\alpha$ 1  | + | + | + | - | - | - |
| Flag-AMPK $\beta$ 1 | + | + | + | - | - | - |
| Myc-AMPK $\gamma$ 1 | + | + | + | - | - | - |

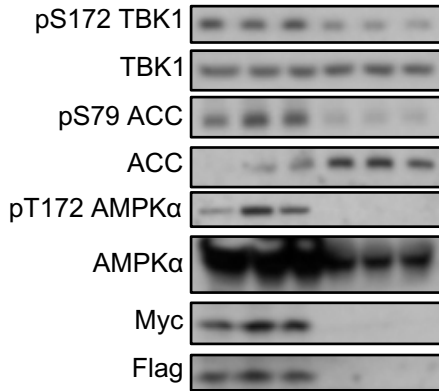

**B**

|                     |   |   |   |   |   |   |
|---------------------|---|---|---|---|---|---|
| Empty vector        | - | - | - | + | + | + |
| HA-AMPK $\alpha$ 1  | + | + | + | - | - | - |
| Flag-AMPK $\beta$ 1 | + | + | + | - | - | - |
| Myc-AMPK $\gamma$ 1 | + | + | + | - | - | - |

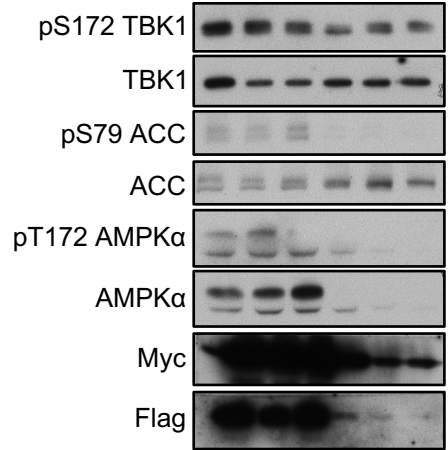

**C**

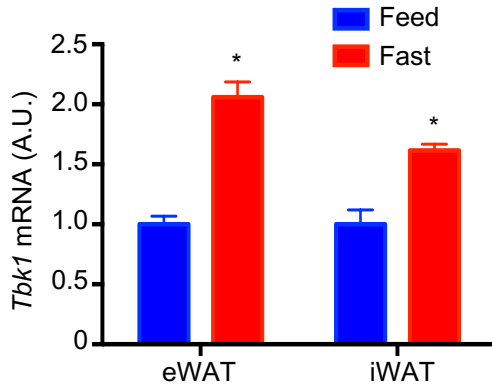

**D**

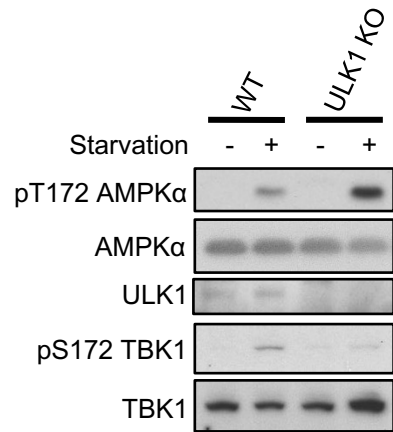

Supplement: NIHMS933063-supplement-4.pdf [file NIHMS933063-supplement-4.pdf]
