# Supplementary material
Source: PubMed Central journal article supplement (PMC5808582)
Supplement: NIHMS933063-supplement-8.pdf [file NIHMS933063-supplement-8.pdf]

## TBK1 at the crossroads of inflammation and energy homeostasis in adipose tissue

Peng Zhao<sup>1,2</sup>, Kai in Wong<sup>1</sup>, Xiaoli Sun<sup>1</sup>, Shannon M. Reilly<sup>1,2</sup>, Maeran Uhm<sup>2</sup>, Zhongji Liao<sup>1</sup>, Yuliya Skorobogatko<sup>1,2</sup>, Alan R. Saltiel<sup>1,2,\*</sup>

### Supplementary figure legends

**Figure S1. Adipocyte-specific TBK1 deficiency does not affect energy homeostasis in ND-fed mice or body temperature in 16 weeks HFD-fed mice. Related to Figure 1.** (A) Body weight of ND-fed Flox and ATKO mice. N=11-15. (B) DEXA imaging of ND-fed Flox and ATKO mice. (C, D) Fat mass (C) or percentage of fat mass (D) of ND-fed Flox and ATKO mice. N=6. (E) Tissues weight of ND-fed Flox and ATKO mice. N=11-15. (F, G) Respiratory exchange rate (RER) of ND (F) or HFD (G)-fed Flox and ATKO mice. N=5-6. (H, I) Activity of ND (H) or HFD (I)-fed Flox and ATKO mice. N=5-6. (J) Daily food intake of ND and HFD-fed Flox and ATKO mice. N=5-6. (K) Rectal temperature of HFD-fed Flox and ATKO mice. N=9. Data are represented as mean±s.e.m. \*, p<0.05.

**Figure S2. TBK1 deficiency increases expression of creatine cycle and lipase genes, without affecting catecholamine sensitivity or AMP/ATP in 16 weeks HFD-fed mice. Related to Figure 2.** (A) Genes expression in BAT of HFD-fed Flox and ATKO mice. N=9. (B, C) Expression of creatine cycle genes in eWAT (B) and iWAT (C) of HFD-fed Flox and ATKO mice. N=9. (D, E) Expression of lipase genes in eWAT (D) and iWAT (E) of HFD-fed Flox and ATKO mice. N=9. (F) cAMP level in eWAT and iWAT of HFD-fed Flox and ATKO mice. N=4. (G, H) Glycerol released from explanted eWAT (G) and iWAT (H) of HFD-fed mice in the absence or presence of CL-316,243 (10µM). N=9. (I, J) Serum triglyceride (TG) (I) and NEFA (J) levels in HFD-fed Flox and ATKO mice. N=11-12. (K) IB analysis of BAT in HFD-fed Flox and ATKO mice. (L) *Tbk1* expression in BAT of ND or HFD-fed mice. N=4. (M, N) IB analysis of eWAT (M) and iWAT (N) in ND-fed Flox and ATKO mice. (O, P) Measurement of AMP/ATP (O) and ADP/ATP (P) ratio in eWAT and iWAT of HFD-fed Flox and ATKO mice. N=5. Data are represented as mean±s.e.m. \*, p<0.05. (Q) IB analysis of WT and TKO (TBK1 KO) MEFs treated with Vehicle or TNFα (10nM). Quantification of pAMPK/AMPK ratio (bottom). Data are represented as mean±s.d. \*, p<0.05.

**Figure S3. Identification of TBK1-induced phosphorylation on AMPKα1 (PRKAA1) by LC-MS/MS. Related to Figure 3.** (A) Coverage of AMPKα1 sequence in LC-MS/MS analysis. (B, C) MS chromatogram depicting the phosphopeptide showing AMPKα1 Ser459 (B) and Ser476 (C) phosphorylation (S+80).

**Figure S4. Activation of AMPK induces TBK1 activity. Related to Figure 4.** (A, B) IB analysis of HEK293T cells overexpressing HA-AMPKα1 (A) or HA-AMPKα2 (B) with Flag-AMPKβ1 and Myc-AMPKγ1. (C) Expression of *Tbk1* in eWAT and iWAT of C57BL6/J mice fed with ND or fasted for 48hrs. N=4. Data are represented as mean±s.e.m. \*, p<0.05. (D) IB analysis of WT and ULK1 KO MEFs starved for 2hrs or not. Result is a representative experiment that was repeated three times.

**Figure S5. Loss of TBK1 does not affect glucose metabolism in ND-fed mice or genes expression and H&E staining of liver in HFD-fed mice. Related to Figure 5.** (A, B) Fasting blood glucose (A) and insulin (B) levels of 12 weeks ND or HFD-fed Flox and ATKO mice. N=7-11. (C) Glucose (2g/kg BW) tolerance test on 12 weeks ND-fed Flox and ATKO mice.

N=7. (D) Insulin (1U/kg BW) tolerance test on 12 weeks ND-fed Flox and ATKO mice. N=7-8. Data are represented as mean±s.e.m. \*, p<0.05. (E) Blood insulin levels at 0 min or 30 min during GTT on HFD-fed Flox and ATKO mice. N=10-11. (F) H&E staining of livers in 16 weeks HFD-fed Flox and ATKO mice. (G) Genes expression in livers of 16 weeks HFD-fed Flox and ATKO mice. N=10-11. Data are represented as mean±s.e.m. \*, p<0.05.

**Figure S6. Loss of TBK1 increases TNF $\alpha$ -induced NF $\kappa$ B activation. Related to Figure 6.**

(A) IB analysis of BAT from HFD-fed Flox and ATKO mice. (B, C) IB analysis of eWAT (B) and iWAT (C) from ND-fed Flox and ATKO mice. (D) IB analysis of WT or TKO MEFs treated with TNF $\alpha$  (10nM) for indicated time. (E) *Ccl2* expression in WT or TKO MEFs treated with TNF $\alpha$  (5nM) for 16hrs. N=3. Data are represented as mean±s.d. \*, p<0.05. (F) IB analysis of WT or TKO MEFs treated with TNF $\alpha$  (10nM) for indicated time. (G) IB analysis of HEK293T cells overexpressing HA-NIK with Flag-TBK1 WT or Flag-TBK1 KD. (H) IB analysis of product from immunoprecipitation with HA-antibody. (I) IB analysis of WT, NKO, TKO or DKO MEFs treated with proteasome inhibitor MG132 (20 $\mu$ M) for 6hrs.

**Figure S7. TBK1 deficiency attenuates inhibition of NF $\kappa$ B signaling by AMPK. Related to Figure 7.**

(A) IB analysis of WT and TKO MEFs pretreated with Vehicle or AICAR (500 $\mu$ M) for 7hrs, and then treated with TNF $\alpha$  (10nM) for 45min. (B) *Ccl2* expression in WT and TKO MEFs pretreated with Vehicle or AICAR (500 $\mu$ M) for 7hrs, and then treated with TNF $\alpha$  (10nM) for 2hrs. Data are represented as mean±s.d. \*, p<0.05. (C) Proposed model for roles of TBK1 in modulating inflammation and energy metabolism.

**Supplementary table**

**Table S1. Identification of TBK1-induced phosphorylation sites on AMPK $\alpha$ 1. Related to Figure 3.**

**Table S2. Q-PCR primer sequences**

| Gene          | Forward Primer          | Reverse Primer          |
|---------------|-------------------------|-------------------------|
| <i>Adgre1</i> | CCCCAGTGTCTTACAGAGTG    | GTGCCCAGAGTGGATGTCT     |
| <i>Atp5d</i>  | AAGATGCCAAAGGCTCCAG     | GATGTCCTTCACCTTTGCCT    |
| <i>Ccl2</i>   | TTAAAAACCTGGATCGGAACCAA | GCATTAGCTTCAGATTTACGGGT |
| <i>Cox4i1</i> | GCAGACAGCATCGTGACAT     | GAGAGCCATTTCTACTTCGGT   |
| <i>Cox5b</i>  | GCGAAGTAACCTTGAAGCCA    | CCGCCATCTTGCTCAG        |
| <i>Cox8a</i>  | CTTCGAGTGGACCTGAGC      | CATCTTGACTCCCTGACCTTG   |
| <i>Fasn</i>   | GGAGGTGGTGATAGCCGGTAT   | TGGTAATCCATAGAGCCCAG    |
| <i>G6pc</i>   | CGACTCGCTATCTCCAAGTGA   | GTTGAACCAGTCTCCGACCA    |
| <i>Gapdh</i>  | TGAAGCAGGCATCTGAGGG     | CGAAGGTGGAAGAGTGGGAG    |
| <i>Itgax</i>  | CTGGATAGCCTTTCTTCTGCTG  | GCACACTGTGTCCGAACTCA    |
| <i>Lipe</i>   | GGCTCACAGTTACCATCTCACC  | GAGTACCTTGCTGTCTCTGTCC  |
| <i>Mrc1</i>   | CTCTGTTCAGCTATTGGACGC   | CGGAATTTCTGGGATTCAGCTTC |

|                 |                        |                         |
|-----------------|------------------------|-------------------------|
| <i>Ndufs7</i>   | CTTCTGTTACGCTTGATCTTC  | GGCTACTACCACTACTCCTACT  |
| <i>Pck1</i>     | ACACACACACATGCTCACAC   | ATCACCGCATAGTCTCTGAA    |
| <i>Pnpla2</i>   | CAACGCCACTCACATCTACGG  | TCACCAGGTTGAAGGAGGGAT   |
| <i>Ppargc1a</i> | CCACTTCAATCCACCCAGAAA  | TATGGAGTGACATAGAGTGTGCT |
| <i>Scd1</i>     | GCTGGAGTACGTCTGGAGGAA  | TCCCGAAGAGGCAGGTGTAG    |
| <i>Srebf1</i>   | TGACCCGGCTATTCCGTGA    | CTGGGCTGAGCAATACAGTTC   |
| <i>Tnfa</i>     | ACGGCATGGATCTCAAAGAC   | AGATAGCAAATCGGCTGACG    |
| <i>Tbk1</i>     | GACAGCATAGAGATCACCAGTT | CAGAGCACCTCCAACCATC     |
| <i>Ucp1</i>     | AGGCTTCCAGTACCATTAGGT  | CTGAGTGAGGCAAAGCTGATTT  |
