# Supplementary material
Source: PubMed Central journal article supplement (PMC5808582)

# Supplementary figure 1

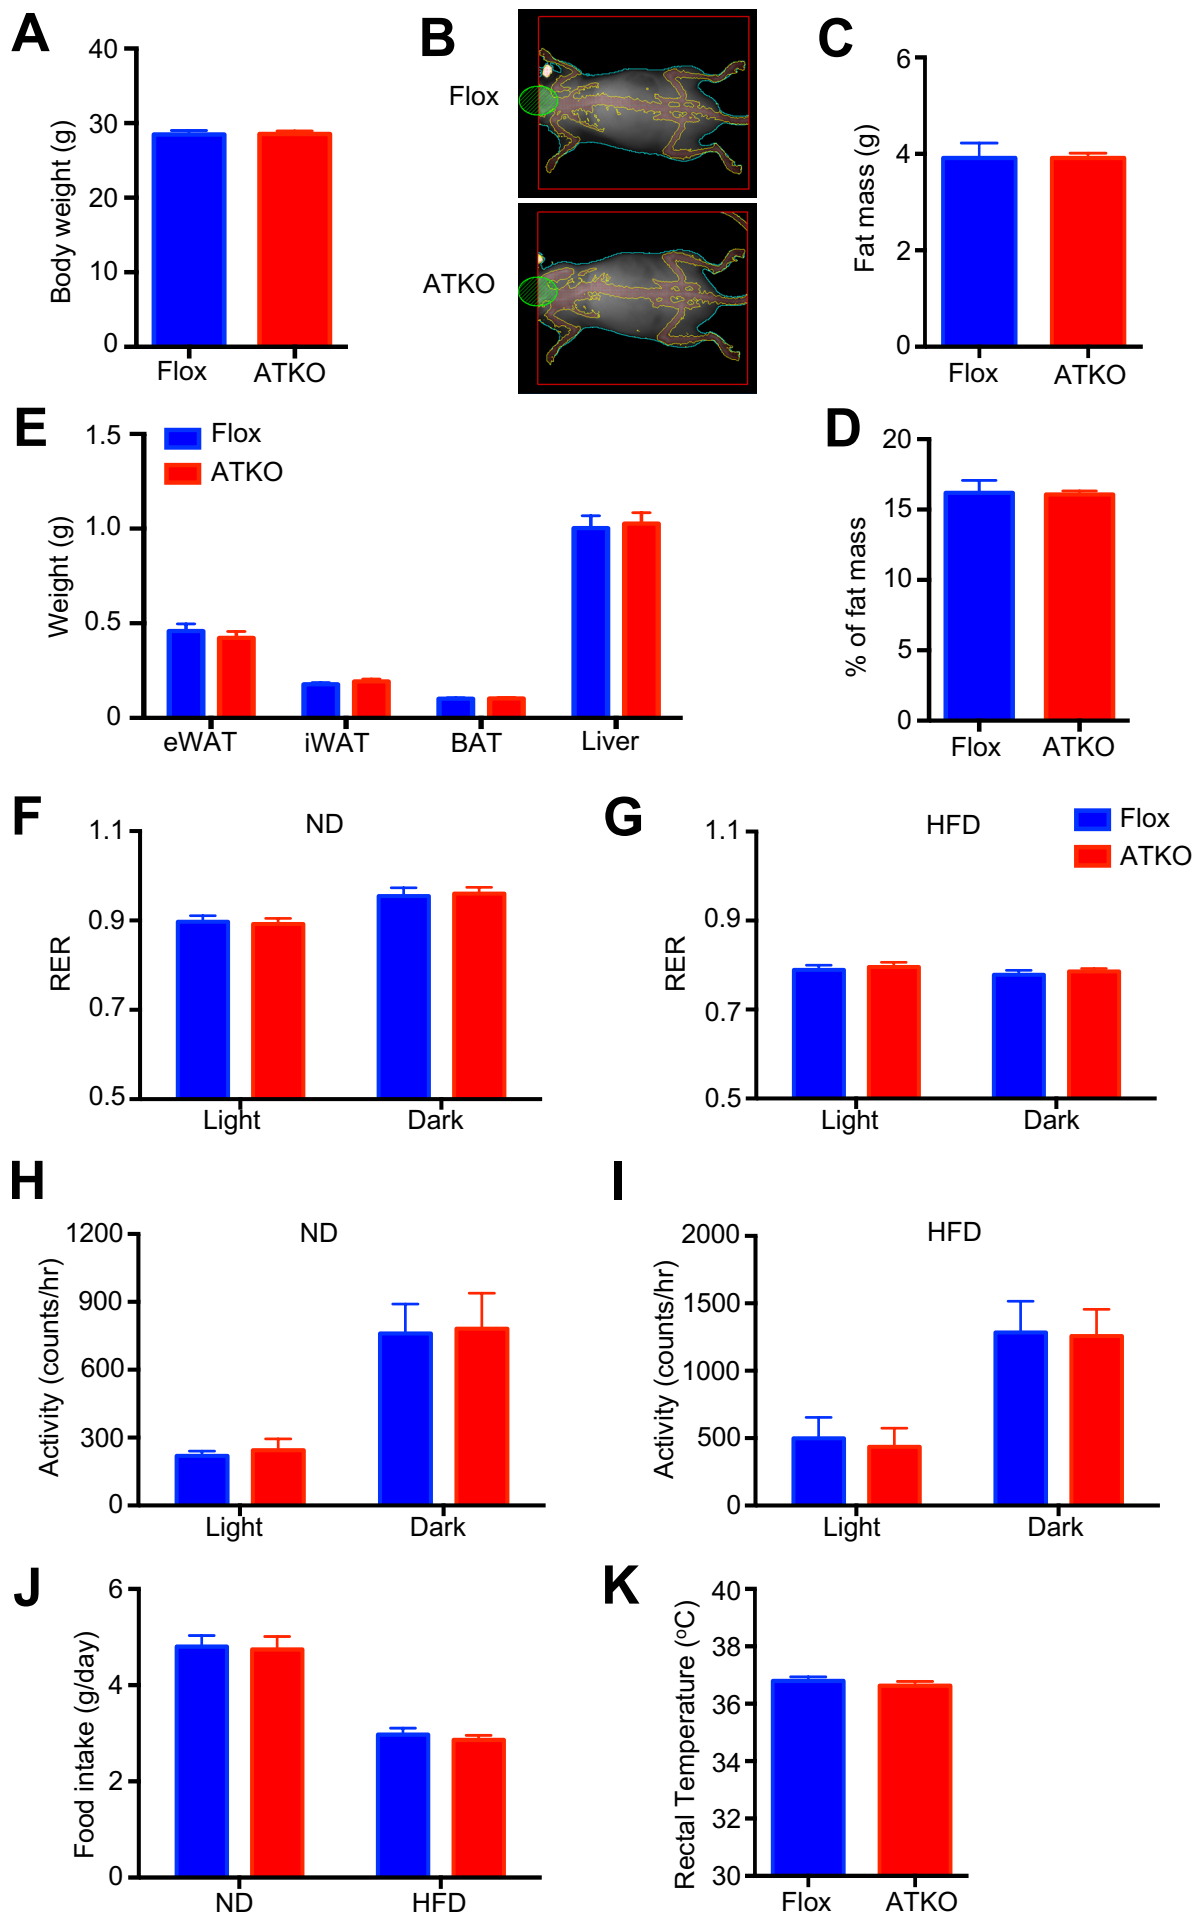

Supplement: NIHMS933063-supplement-1.pdf [file NIHMS933063-supplement-1.pdf]

# Supplementary figure 2

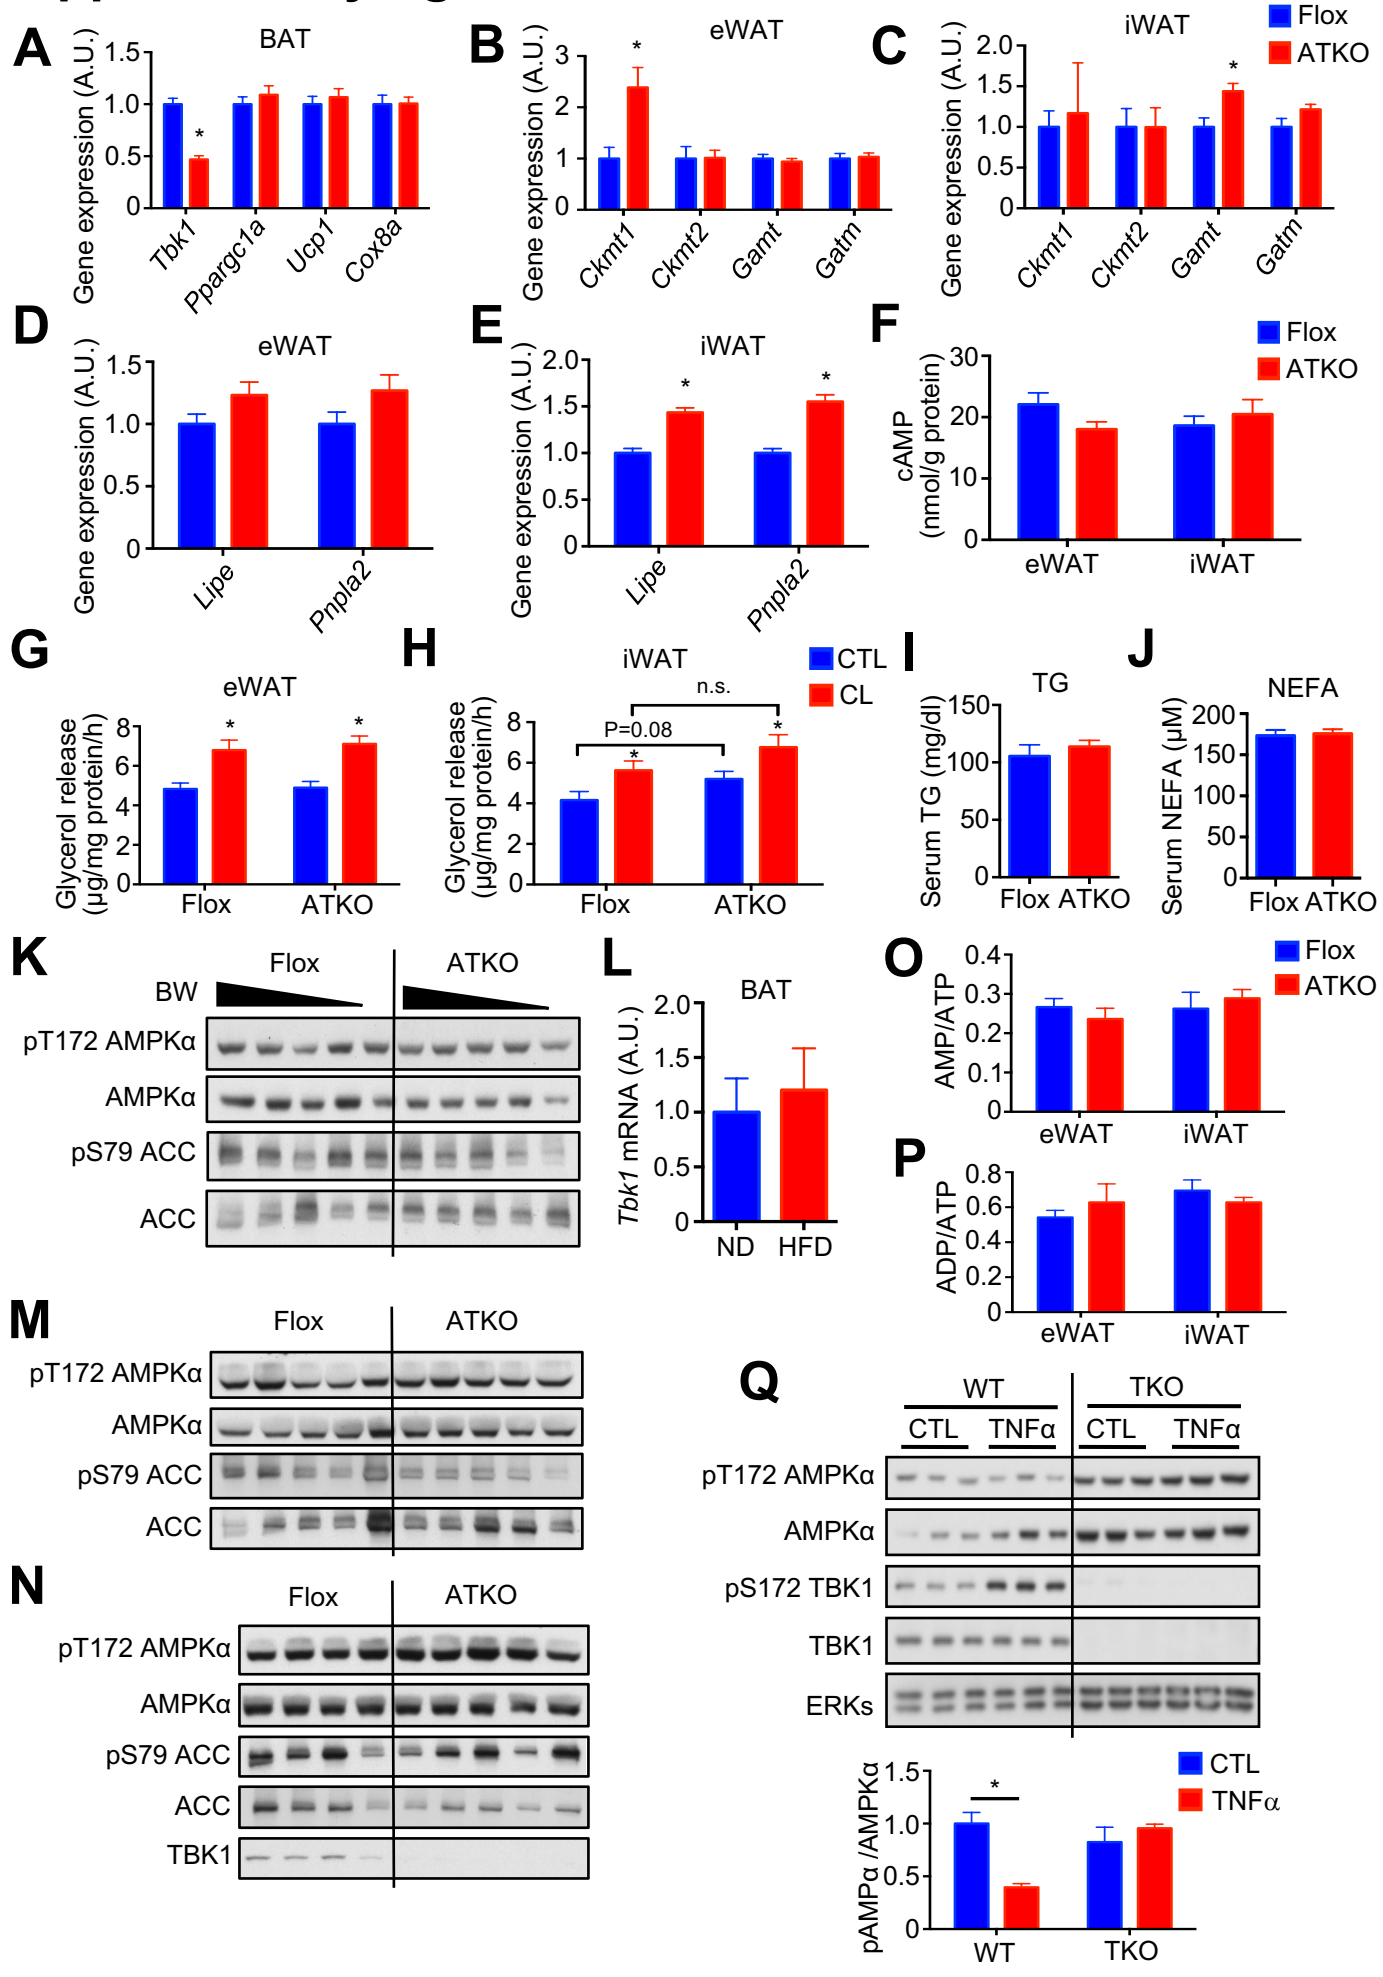

Supplement: NIHMS933063-supplement-2.pdf [file NIHMS933063-supplement-2.pdf]

# Supplementary figure 5

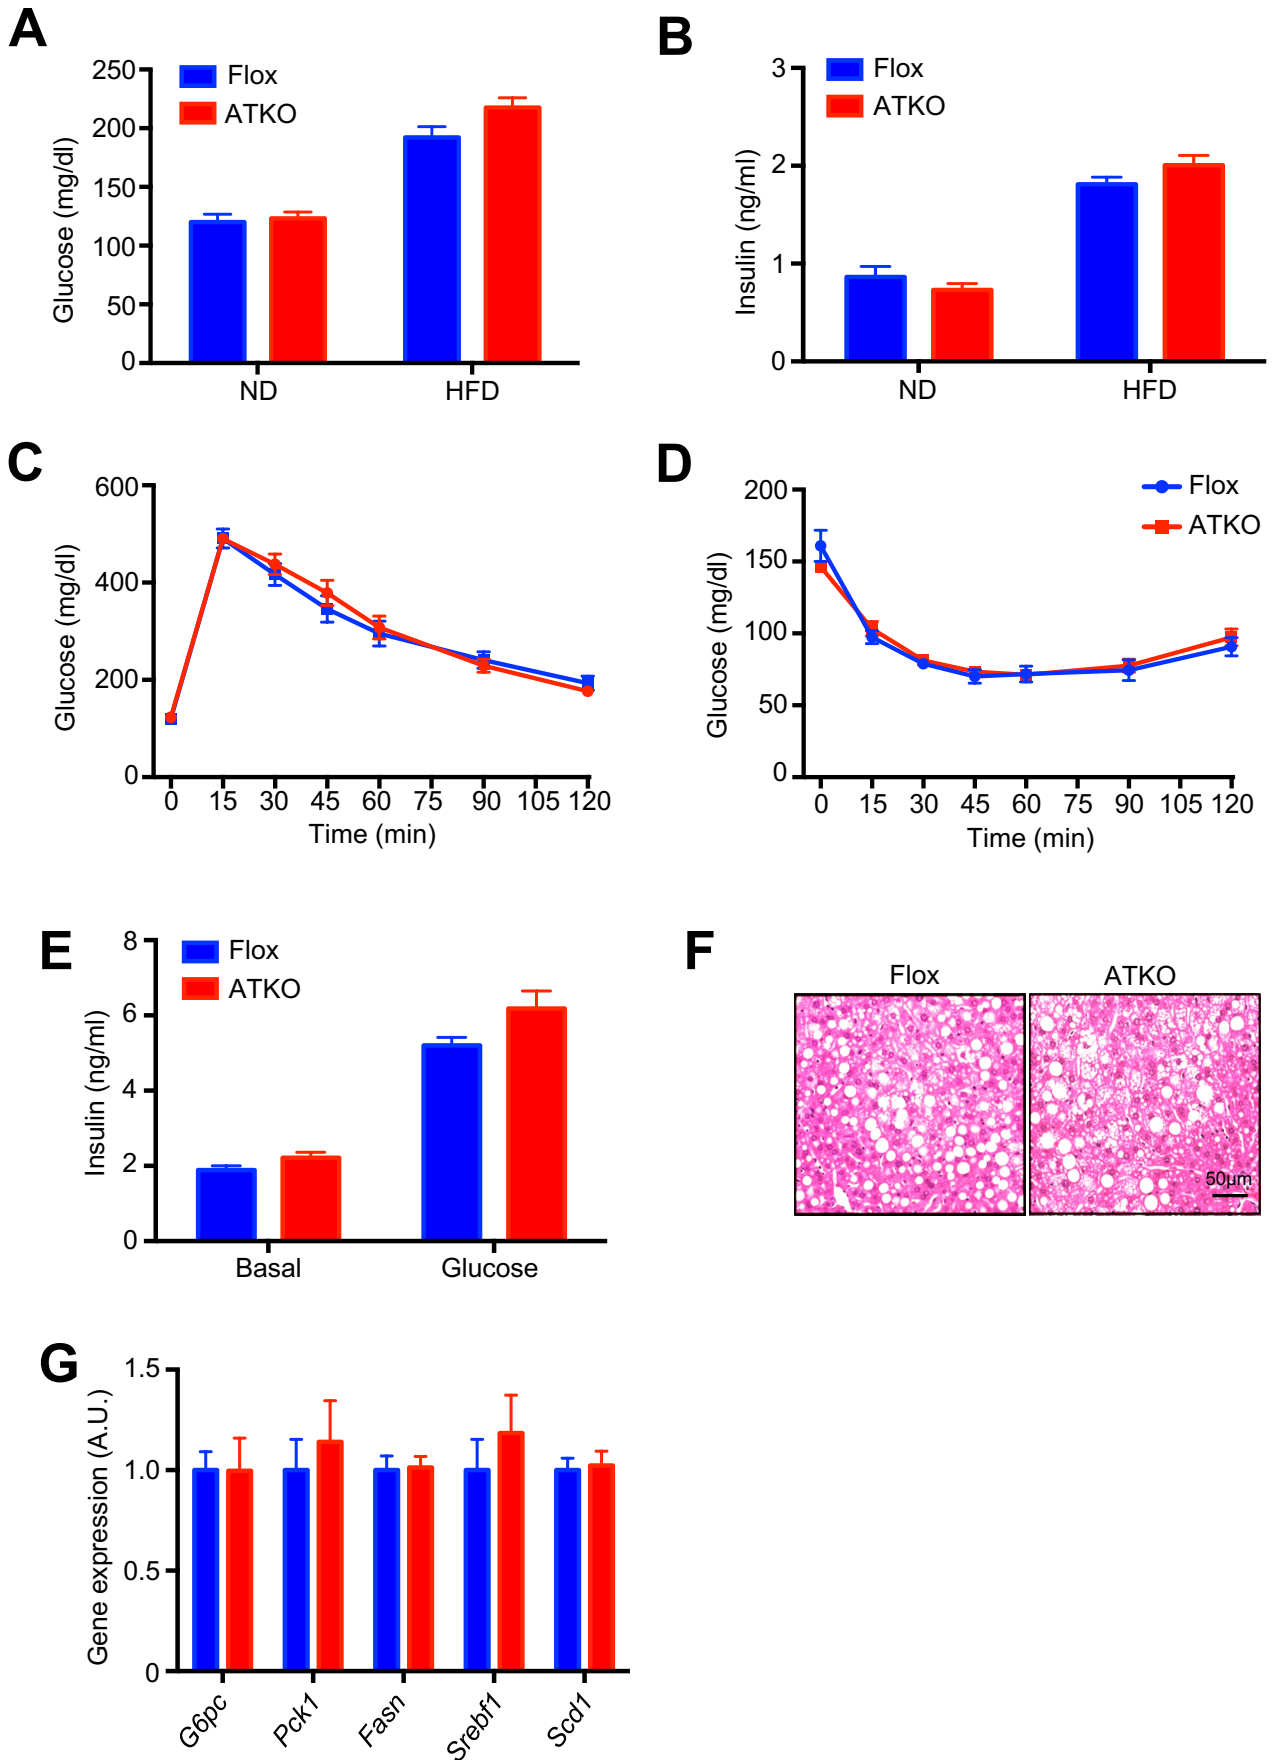

Supplement: NIHMS933063-supplement-5.pdf [file NIHMS933063-supplement-5.pdf]

# Supplementary figure 6

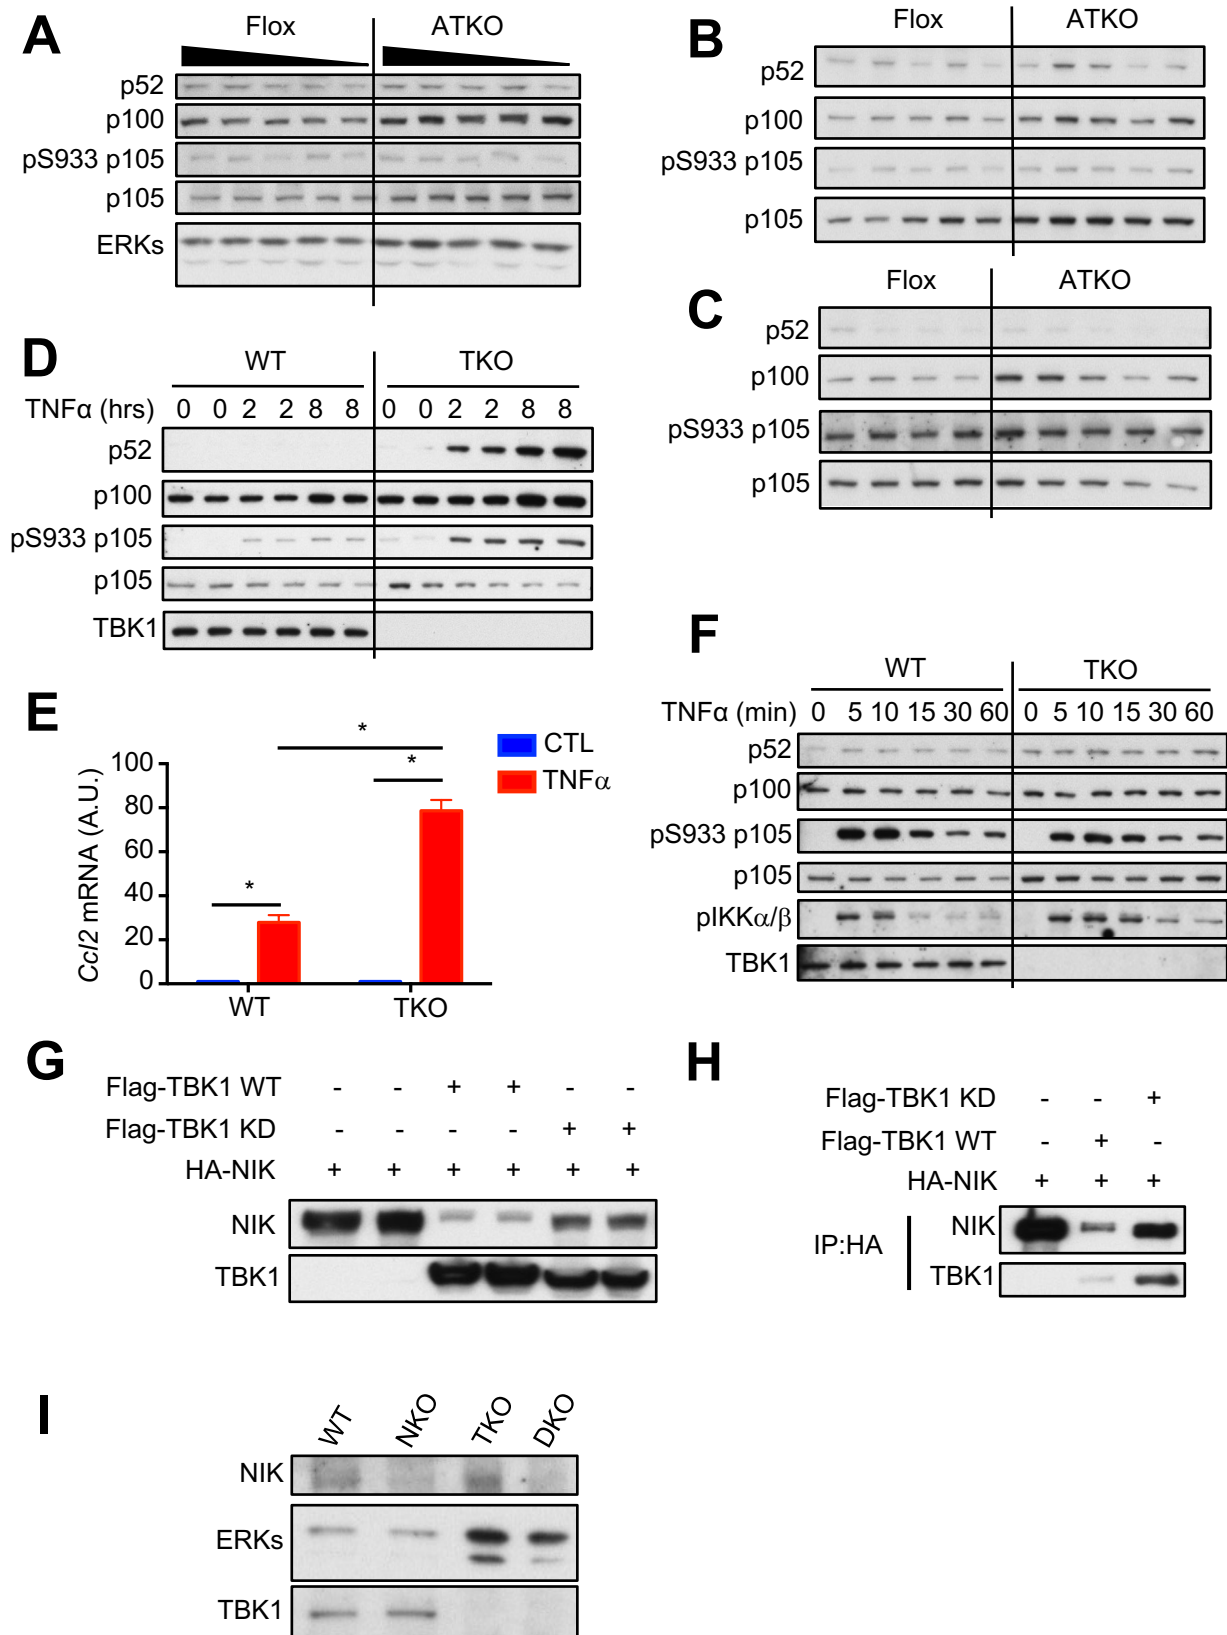

Supplement: NIHMS933063-supplement-6.pdf [file NIHMS933063-supplement-6.pdf]

# Supplementary figure 7

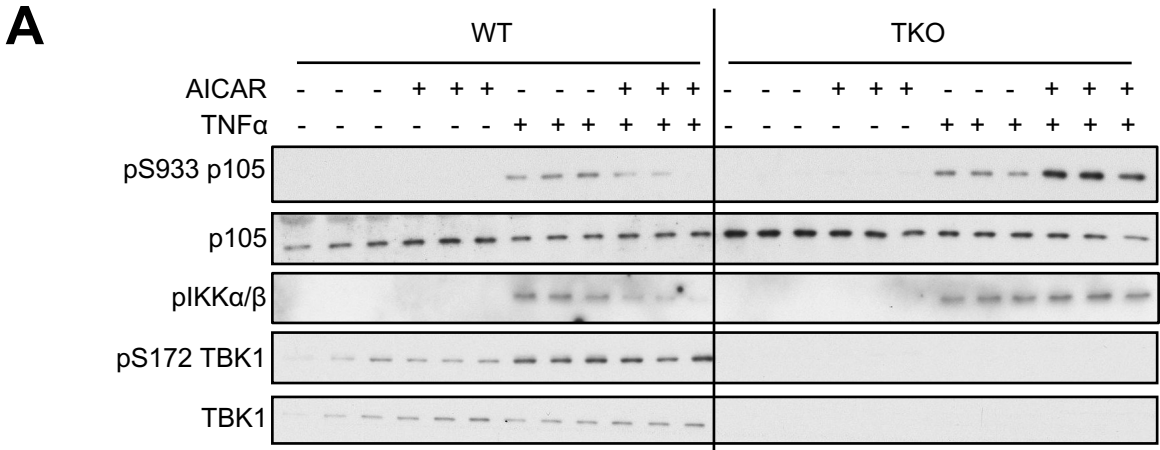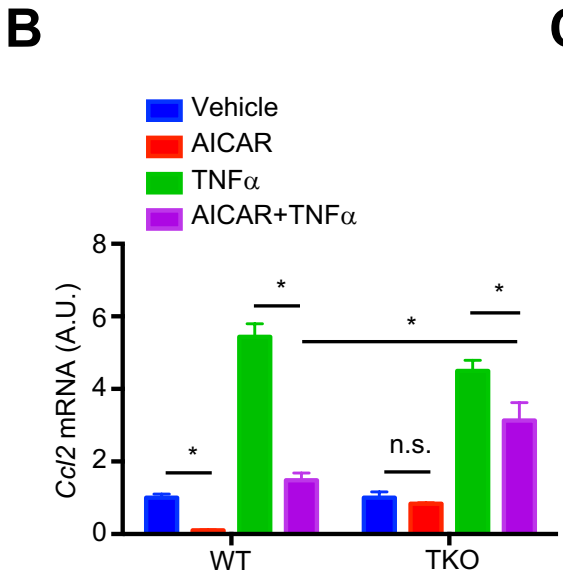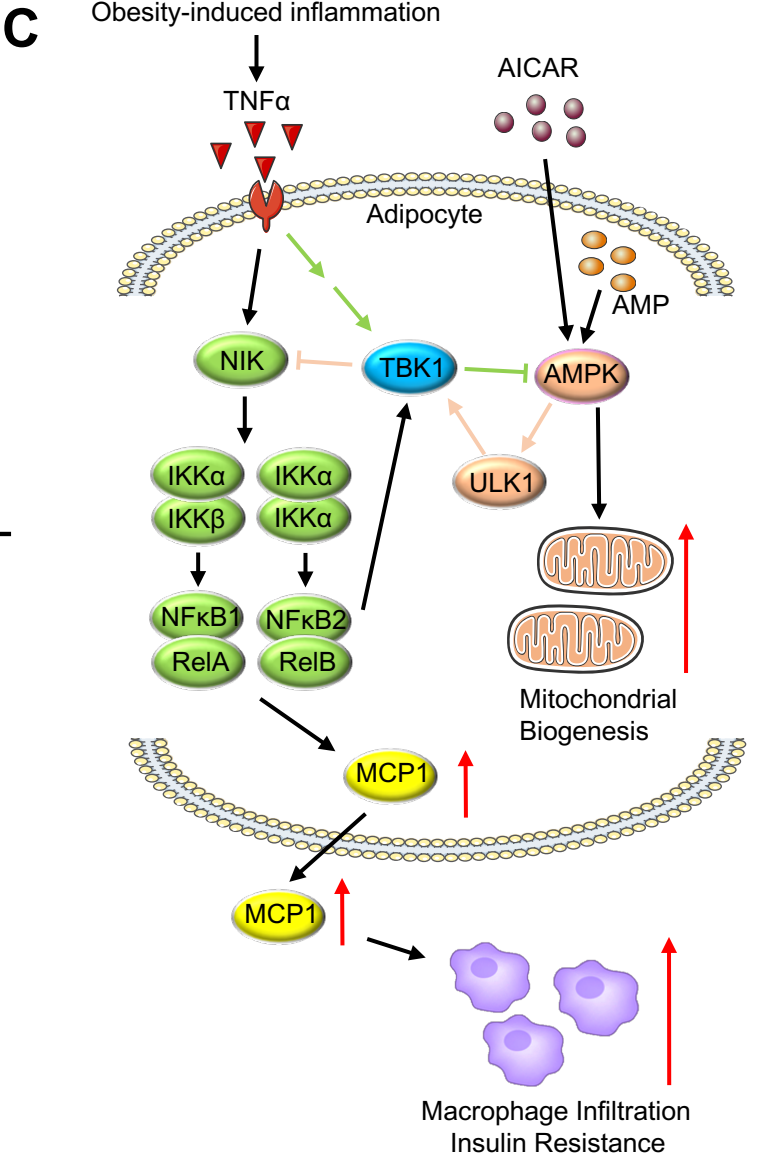

Supplement: NIHMS933063-supplement-7.pdf [file NIHMS933063-supplement-7.pdf]
